# Supplementary material for: ActS activates peptidoglycan amidases during outer membrane stress in Escherichia coli
Source: PubMed Central journal article supplement (PMC8360153; doi:10.1111/mmi.14712), 2021-03-23
Supplement: MMI-116-329-s002.pdf [file MMI-116-329-s002.pdf]

## SUPPORTING INFORMATION

### **ActS activates peptidoglycan amidases during outer membrane stress in *Escherichia coli***

Carlos K. Gurnani Serrano<sup>1</sup>, Matthias Winkle<sup>2</sup>, Alessandra M. Martorana<sup>1</sup>, Jacob Biboy<sup>2</sup>, Niccolo Morè<sup>1§</sup>, Patrick Moynihan<sup>3</sup>, Manuel Banzhaf<sup>3</sup>, Waldemar Vollmer<sup>2#</sup> and Alessandra Polissi<sup>1#</sup>

<sup>1</sup> Dipartimento di Scienze Farmacologiche e Biomolecolari, Università degli Studi di Milano, Milan, Italy.

<sup>2</sup> The Centre for Bacterial Cell Biology, Biosciences Institute, Newcastle University, Newcastle upon Tyne, NE3 2AX, United Kingdom.

<sup>3</sup> Institute of Microbiology and Infection, School of Biological Sciences, University of Birmingham, Birmingham, B15 2TT, United Kingdom.

§ Present address: Nikon Instruments Europe B.V., Amsterdam, North Holland, Netherlands.

#Address correspondence to Alessandra Polissi, [alessandra.polissi@unimi.it](mailto:alessandra.polissi@unimi.it); Waldemar Vollmer, [w.vollmer@ncl.ac.uk](mailto:w.vollmer@ncl.ac.uk)

## INDEX

- Figure S1** Deletion of *actS* does not rescue lysis phenotype of *araBplptC*  $\Delta$ *ldtD* and *araBplptC*  $\Delta$ *ldtE* mutants.
- Figure S2** Deletion of *actS* does not affect growth and morphology of BW25113 (*lptC*<sup>+</sup>) cells.
- Figure S3** Deletion of *actS* along with that of *ldts* does not affect growth and morphology of BW25113 (*lptC*<sup>+</sup>) cells.
- Figure S4** Ectopic expression of *actS* in *araBplptC* does not induce lysis.
- Figure S5** ActS activates AmiA and AmiB.
- Figure S6** Deletion of *amiA*, *amiB* *amiC* or *nlpD* does not rescue the lysis phenotype of the *araBplptC*  $\Delta$ *ldtF* mutant.
- 
- Table S1** Muropeptide composition of *araBplptC*, *araBplptC*  $\Delta$ *actS* and *araBplptC*  $\Delta$ *ldtF*  $\Delta$ *actS* mutants under permissive or nonpermissive conditions (separate file).
- Table S2** Bacterial Strains used in this study.
- Table S3** Plasmids used in this study.
- Table S4** Oligonucleotides used in this study.

**Figure S1**

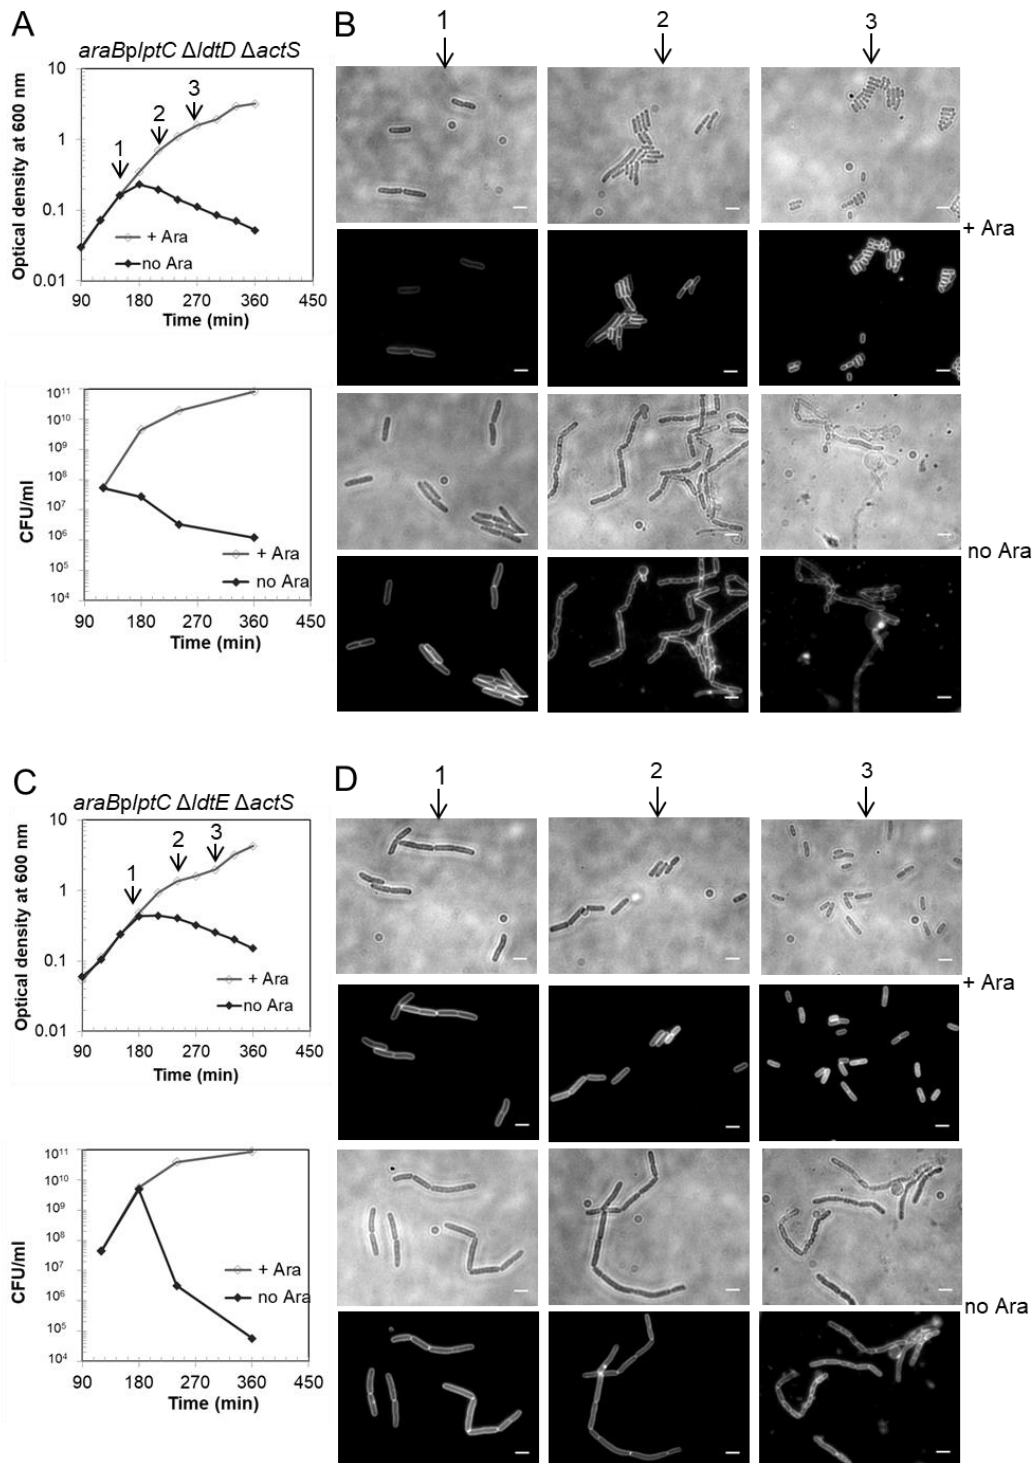

**Figure S1. Deletion of *actS* does not rescue lysis phenotype of *araBplptC ΔldtD* and *araBplptC ΔldtE* mutants.** The strains *araBplptC ΔldtD ΔactS* (A) and *araBplptC ΔldtE ΔactS* (C) were grown in the presence of 0.2% arabinose to an OD<sub>600</sub> of 0.2, harvested, washed three times, and resuspended in an arabinose-supplemented (+ Ara) or arabinose-free (no Ara) medium. Growth was monitored by OD<sub>600</sub> measurements (top panel) and by determining CFU (bottom panel). Growth curves are representative of at least three independent experiments. At t=150, 210, and 270 min (arrows), *araBplptC ΔldtD ΔactS* (B) and *araBplptC ΔldtE ΔactS* (D) cells were imaged. Phase-contrast images (top) and fluorescence images (bottom) are shown. Bars, 3 μm.

**Figure S2**

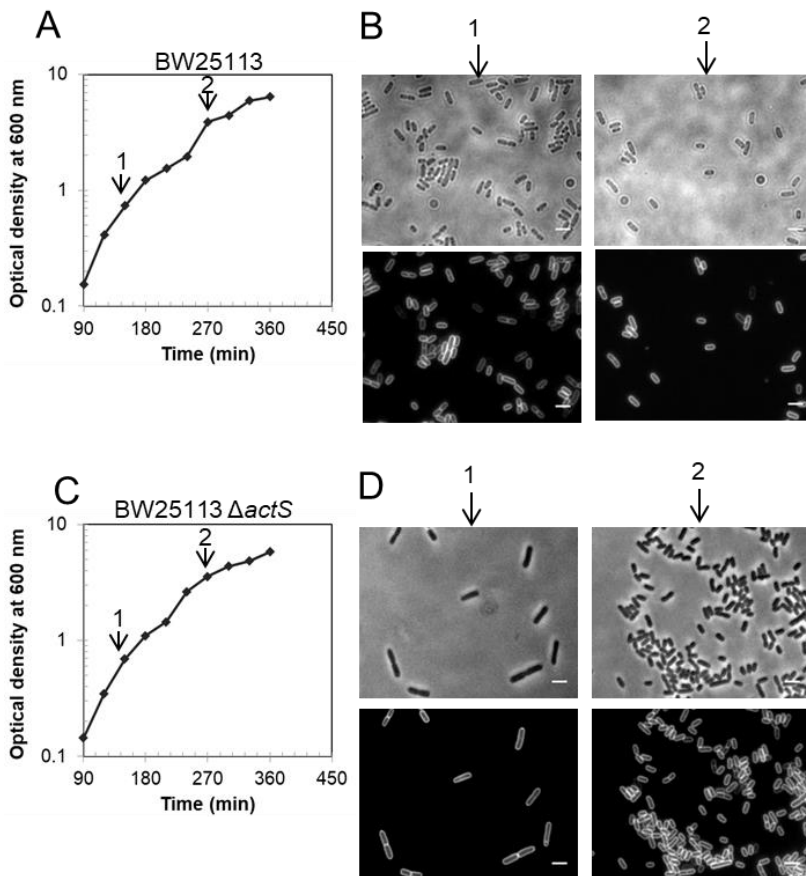

**Figure S2. Deletion of *actS* does not affect growth and morphology of BW25113 (*lptC*<sup>+</sup>) cells.** Growth of BW25113 (A) and BW25113  $\Delta actS$  (C) was monitored by OD<sub>600</sub> measurements. Growth curves are representative of at least three independent experiments. At t=120 and 270 min (arrows), BW25113 (B) and BW25113  $\Delta actS$  (D) cells were collected for imaging. Phase-contrast images (top) and fluorescence images (bottom) are shown. Bars, 3  $\mu$ m.

**Figure S3**

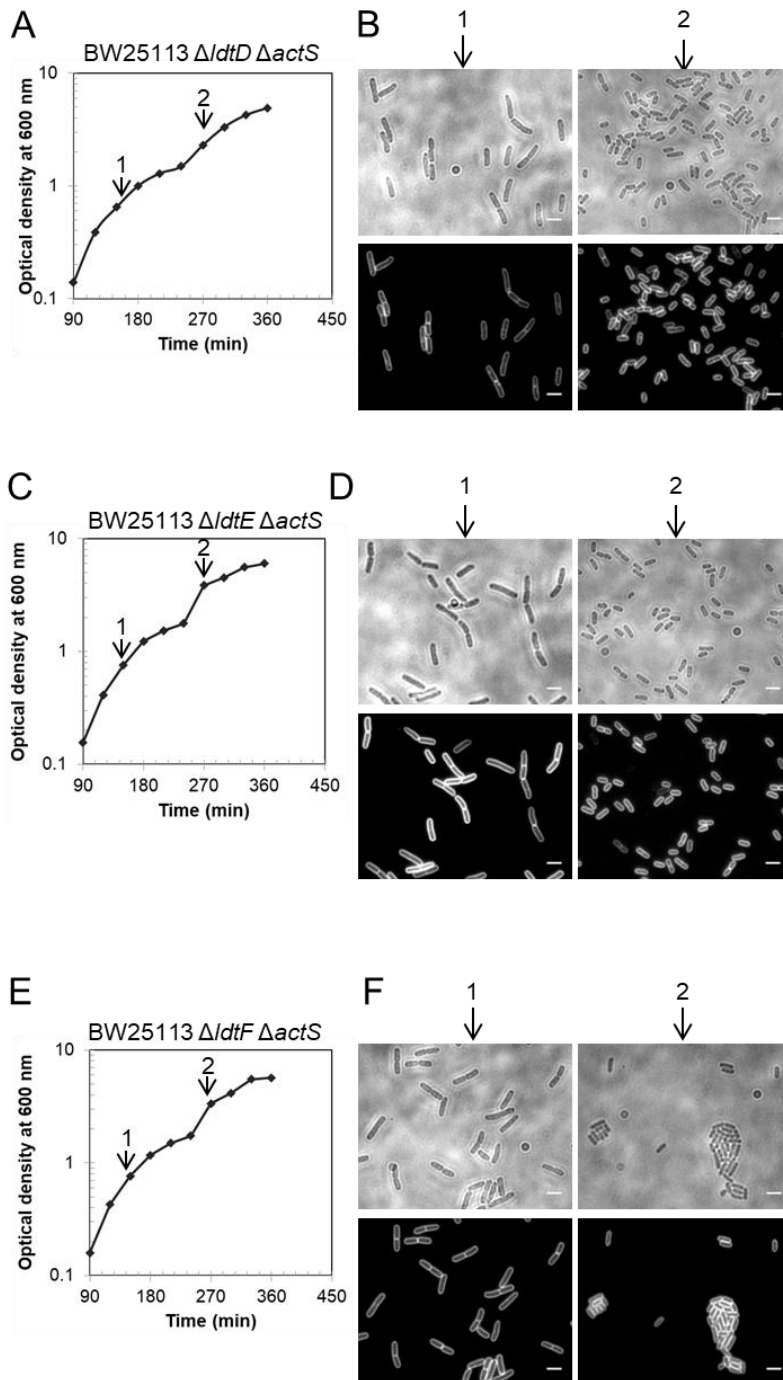

**Figure S3. Deletion of *actS* along with that of *ltds* does not affect growth and morphology of *BW25113* (*lptC*<sup>+</sup>) cells.** Growth of *BW25113 ΔltdD ΔactS* (A), *BW25113 ΔltdE ΔactS* (C) and *BW25113 ΔltdF ΔactS* (E) cells was monitored by OD<sub>600</sub> measurements. Growth curves are representative of at least three independent experiments. At t=120 and 270 min (arrows), *BW25113 ΔltdD ΔactS* (B), *BW25113 ΔltdE ΔactS* (D) and *BW25113 ΔltdF ΔactS* (F) cells were collected for imaging. Phase-contrast images (top) and fluorescence images (bottom) are shown. Bars, 3 μm.

**Figure S4**

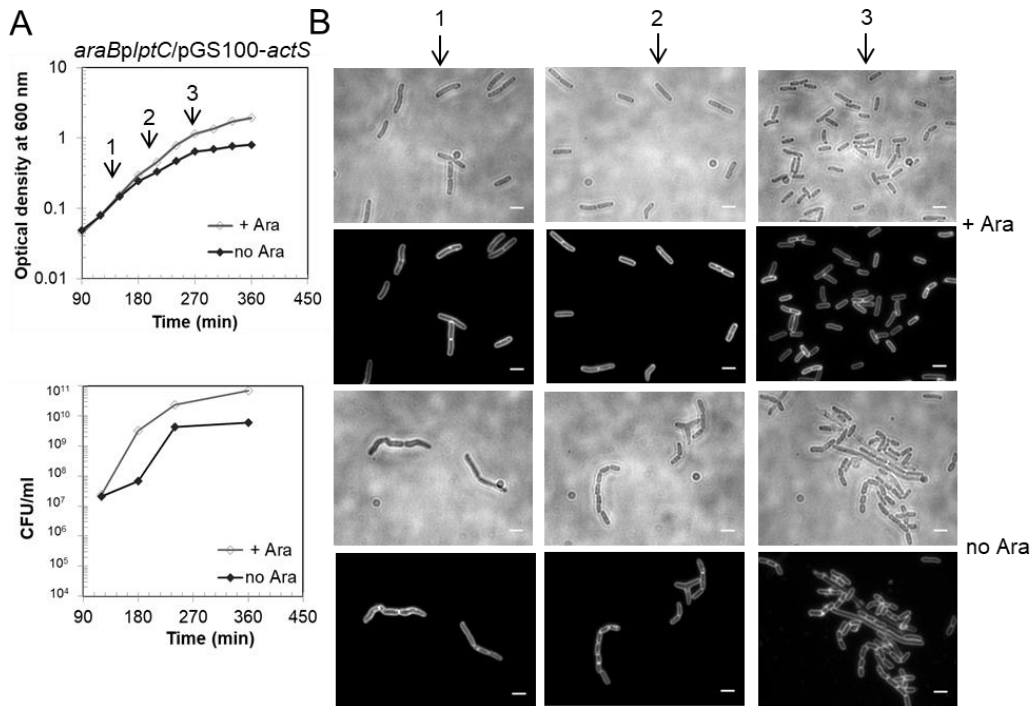

**Figure S4. Ectopic expression of *actS* in *araBplptC* does not induce lysis.** Cells of *araBplptC* harboring pGS100-*actS* were grown in the presence of 0.2% arabinose to an OD<sub>600</sub> of 0.2, harvested, washed three times, and resuspended in an arabinose-supplemented (+ Ara) or arabinose-free (no Ara) medium. **(A)** Growth was monitored by OD<sub>600</sub> measurements (top panel) and by determining CFU (bottom panel). Growth curves are representative of at least three independent experiments. At t=150, 210, and 270 min (arrows), samples were imaged. **(B)** Phase-contrast images (top) and fluorescence images (bottom) are shown. Bars, 3 µm.

**Figure S5**

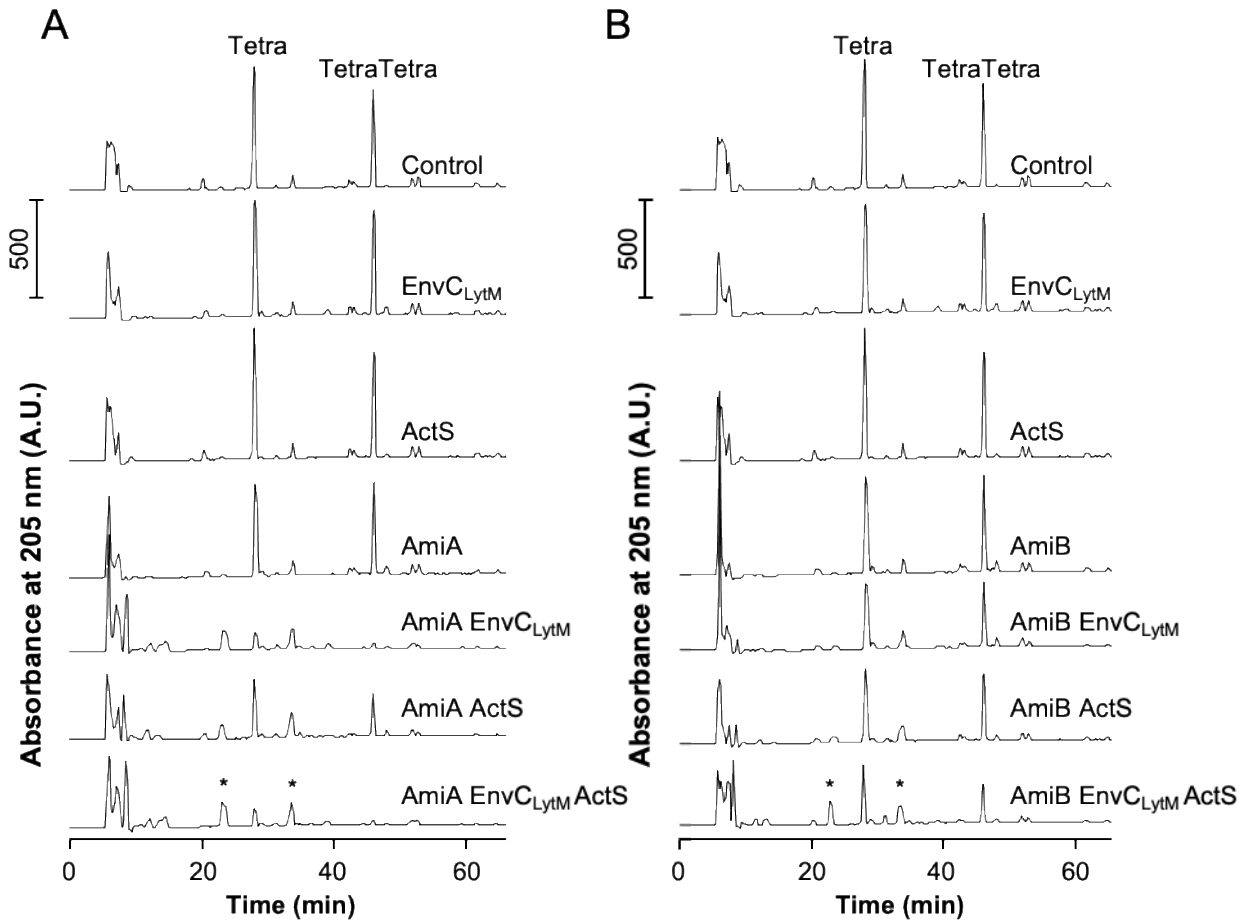

**Figure S5. ActS activates AmiA and AmiB.** HPLC chromatograms showing the activation of (A) AmiA and (B) AmiB by their cognate activator EnvC<sub>LytM</sub> and ActS. *E. coli* PG was incubated with proteins indicated on the right side. Reactions were terminated by boiling for 10 min. Samples were digested with cellosyl and the resulting muropeptides were reduced with sodium borohydride and separated by reversed-phase HPLC. Asterisks indicate products of amidase activity. The structures of Tetra and TetraTetra are shown in Figure 4.

Figure S6

A

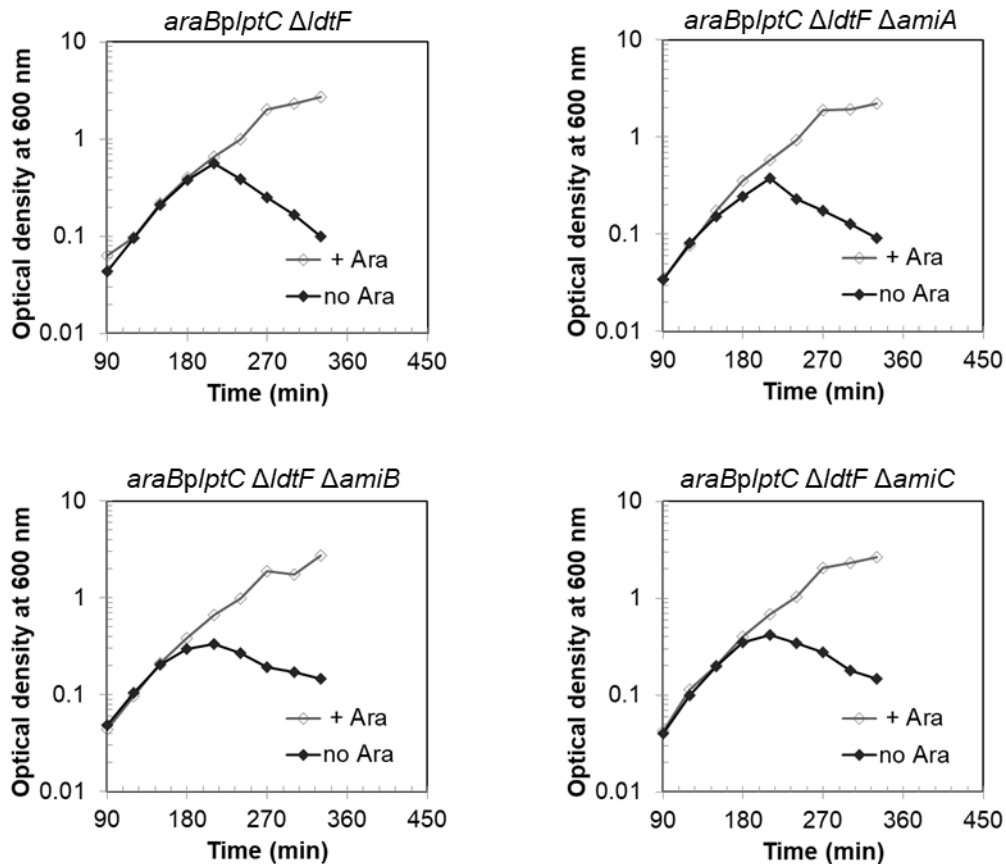

B

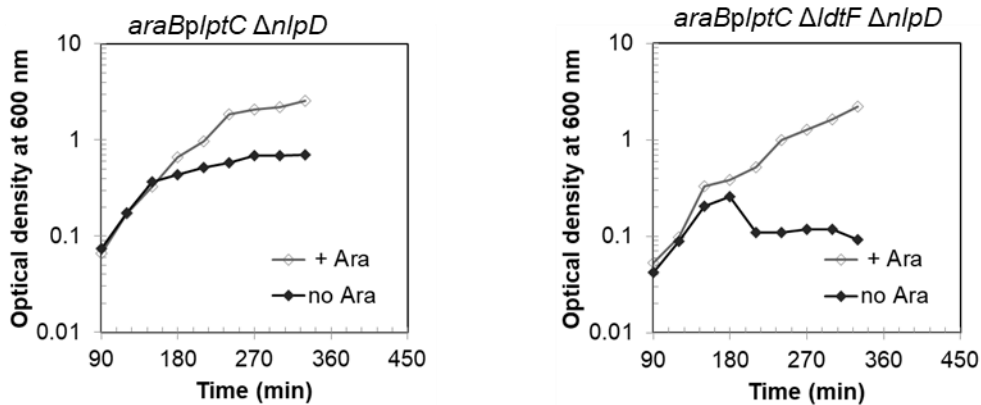

**Figure S6. Deletion of *amiA*, *amiB*, *amiC* or *nlpD* does not rescue the lysis phenotype of the *araBplptC ΔldtF* mutant.** Cells of *araBplptC ΔldtF*, *araBplptC ΔldtF ΔamiA*, *araBplptC ΔldtF ΔamiB*, *araBplptC ΔldtF ΔamiC* (A) and *araBplptC ΔnlpD*, *araBplptC ΔldtF ΔnlpD* (B) were grown in the presence of 0.2% arabinose to an OD<sub>600</sub> of 0.2, harvested, washed three times, and resuspended in an arabinose-supplemented (+ Ara) or arabinose-free (no Ara) medium. Growth was monitored by OD<sub>600</sub> measurements. Growth curves are representative of at least three independent experiments.



**Table S2. Bacterial strains.**

| Strain                 | Relevant genotype or features                                                                                                                          | Source or reference            |
|------------------------|--------------------------------------------------------------------------------------------------------------------------------------------------------|--------------------------------|
| AMM24                  | BW25113 $\Delta ldtF::frt$                                                                                                                             | Morè <i>et al.</i> , 2019      |
| AMM30                  | BB-3 $\Delta ldtF::frt$                                                                                                                                | Morè <i>et al.</i> , 2019      |
| AMM39                  | BW25113 $\Delta actS::frt$                                                                                                                             | This work                      |
| AMM43                  | BW25113 $\Delta actS::frt \Delta ldtD::frt$                                                                                                            | This work                      |
| AMM44                  | BW25113 $\Delta actS::frt \Delta ldtE::frt$                                                                                                            | This work                      |
| AMM45                  | BW25113 $\Delta actS::frt \Delta ldtF::frt$                                                                                                            | This work                      |
| AMM46                  | BB-3 $\Delta actS::frt$                                                                                                                                | This work                      |
| AMM47                  | BB-3 $\Delta ldtD::frt \Delta actS::frt$                                                                                                               | This work                      |
| AMM48                  | BB-3 $\Delta ldtE::frt \Delta actS::frt$                                                                                                               | This work                      |
| AMM49                  | BB-3 $\Delta ldtF::frt \Delta actS::frt$                                                                                                               | This work                      |
| AMM88                  | BW25113 $\Delta ldtF::frt \Delta nlpD::frt$                                                                                                            | This work                      |
| AMM89                  | BB-3 $\Delta ldtF::frt \Delta nlpD::frt$                                                                                                               | This work                      |
| AMM90                  | BB-3 $\Delta nlpD::frt$                                                                                                                                | This work                      |
| BB-3                   | BW25113 $\Phi(kan\ araC\ araBplptC)1$                                                                                                                  | Sperandeo <i>et al.</i> , 2006 |
| BL21(DE3)              | F- <i>ompT hsdSB(rB- mB-) gal dcm</i> (DE3)                                                                                                            | Novagen                        |
| BW25113                | <i>lacI<sup>q</sup> rrmB<sub>T14</sub> <math>\Delta lacZ_{WJ16}</math> hsdR514 <math>\Delta araBAD_{AH33}</math> <math>\Delta rhaBAD_{LD78}</math></i> | Datsenko and Wanner, 2000      |
| BW25113 $\Delta 6$ LDT | <i><math>\Delta ycbB \Delta erfK \Delta ycfS \Delta ybiS \Delta ynhG \Delta yafK</math></i>                                                            | Kuru <i>et al.</i> 2017        |
| CKG02                  | BW25113 $\Delta nlpD::frt$                                                                                                                             | This work                      |
| CKG04                  | BW25113 $\Delta envC::frt$                                                                                                                             | This work                      |
| CKG06                  | BW25113 $\Delta amiA::frt$                                                                                                                             | This work                      |
| CKG08                  | BW25113 $\Delta amiB::frt$                                                                                                                             | This work                      |
| CKG10                  | BW25113 $\Delta amiC::frt$                                                                                                                             | This work                      |
| CKG12                  | BW25113 $\Delta nlpD::frt \Delta envC::frt$                                                                                                            | This work                      |
| CKG14                  | BW25113 $\Delta amiA::frt \Delta amiC::frt$                                                                                                            | This work                      |
| CKG16                  | BW25113 $\Delta amiA::frt \Delta amiB::frt \Delta amiC::frt$                                                                                           | This work                      |
| CKG18                  | BW25113 $\Delta envC::frt \Delta amiC::frt$                                                                                                            | This work                      |
| CKG20                  | BW25113 $\Delta nlpD::frt \Delta amiB::frt$                                                                                                            | This work                      |
| CKG21                  | BW25113 $\Delta nlpD::frt \Delta amiA::kan \Delta amiB::frt$                                                                                           | This work                      |
| CKG22                  | BB-3 $\Delta ldtF::frt \Delta amiA::frt$                                                                                                               | This work                      |
| CKG23                  | BB-3 $\Delta ldtF::frt \Delta amiB::frt$                                                                                                               | This work                      |
| CKG24                  | BB-3 $\Delta ldtF::frt \Delta amiC::frt$                                                                                                               | This work                      |
| DH5 $\alpha$           | $\Delta(argF-lacI69) \phi 80\ dlacZ58(M15) glnV44(AS) \lambda: rfbD1$<br><i>gyrA96 recA1 endA1 spoT1 thi-1 hsdR17</i>                                  | Hanahan, 1983                  |
| JW2428                 | BW25113 $\Delta amiA764::kan$                                                                                                                          | Baba <i>et al.</i> , 2006      |
| JW2712                 | BW25113 $\Delta nlpD747::kan$                                                                                                                          | Baba <i>et al.</i> , 2006      |
| JW2833                 | BW25113 $\Delta ygeR787::kan$                                                                                                                          | Baba <i>et al.</i> , 2006      |
| JW4127                 | BW25113 $\Delta amiB790::kan$                                                                                                                          | Baba <i>et al.</i> , 2006      |
| JW5449                 | BW25113 $\Delta amiC742::kan$                                                                                                                          | Baba <i>et al.</i> , 2006      |
| JW5646                 | BW25113 $\Delta envC725::kan$                                                                                                                          | Baba <i>et al.</i> , 2006      |
| LOBSTR-<br>BL21(DE3)   | F- <i>ompT hsdSB(rB- mB-) gal dcm</i> (DE3), carries<br>genomically modified copies of <i>arnA</i> and <i>slyD</i>                                     | Kerafast                       |
| MC1061                 | <i>araD139 <math>\Delta(araA-leu)7697 \Delta(lac)X74 galK16</math> galE15(GalS) lambda- e14- mcrA0 relA1 rpsL150(strR)</i><br><i>spoT1 mcrB1 hsdR2</i> | Casadaban and Cohen, 1980      |

**Table S3. Plasmids.**

| Plasmids                            | Relevant characteristics                                                                                                                                                                                    | Source or reference            |
|-------------------------------------|-------------------------------------------------------------------------------------------------------------------------------------------------------------------------------------------------------------|--------------------------------|
| pCP20                               | FLP expression, temperature sensitive replication; Cam <sup>R</sup> and Amp <sup>R</sup> .                                                                                                                  | Datsenko and Wanner, 2000      |
| pET28a His- <i>actS</i>             | pET28a derivative; expresses <i>actS</i> from the T7 promoter starting from amino acid 27 and fused at N-terminal with 6xHis tag.                                                                           | This work                      |
| pGS100                              | pGZ119EH derivative, contains TIR sequence downstream of <i>ptac</i> , Cam <sup>R</sup> .                                                                                                                   | Sperandeo <i>et al.</i> , 2006 |
| pGS100- <i>actS</i>                 | pGZ119H derivative; expresses full length <i>actS</i> <sup>(1-251)</sup> under the <i>tac</i> promoter; Cam <sup>R</sup> .                                                                                  | This work                      |
| pGS100- <i>actS</i> <sub>LysM</sub> | pGZ119H derivative; expresses a <i>actS</i> construct containing the signal sequence and the LysM domain (1-106 residues) under the <i>tac</i> promoter; Cam <sup>R</sup> .                                 | This work                      |
| pGS100- <i>actS</i> <sub>LytM</sub> | pGZ119H derivative; expresses a chimeric version of <i>actS</i> containing the signal sequence (1-39 residues) fused to the LytM domain (84-251 residues) under the <i>tac</i> promoter; Cam <sup>R</sup> . | This work                      |
| pKD46                               | λ-Red expression under the <i>araBp</i> promoter, temperature sensitive replication; Amp <sup>R</sup> .                                                                                                     | Datsenko and Wanner, 2000      |
| pET28a-His-EnvC                     | pET28a derivative; expresses <i>envC</i> from the T7 and fused at N-terminal with 6xHis tag.                                                                                                                | This work                      |
| pTU104                              | <i>bla lacIq</i> PT7::h-sumo-lytENVC                                                                                                                                                                        | Uehara <i>et al.</i> , 2010    |
| pTU119                              | <i>bla lacIq</i> PT7::h-sumo-nlpD(27-379)                                                                                                                                                                   | Uehara <i>et al.</i> , 2010    |
| pTB327                              | <i>bla lacIq</i> PT7::h-sumo-amiA(34-289)                                                                                                                                                                   | Uehara <i>et al.</i> , 2010    |
| pTB324                              | <i>bla lacIq</i> PT7::h-sumo-amiB(23-445)                                                                                                                                                                   | Uehara <i>et al.</i> , 2010    |
| pTU203                              | <i>bla lacIq</i> PT7::h-sumo-amiC(32-418)                                                                                                                                                                   | Uehara <i>et al.</i> , 2010    |

**Table S4. Oligonucleotides.**

| Name                          | Sequence (5'-3')                        | Description                                                                                      | Used to make                                                                                      |
|-------------------------------|-----------------------------------------|--------------------------------------------------------------------------------------------------|---------------------------------------------------------------------------------------------------|
| AP618/30 <i>actS</i> -f       | CAGGAATTCAACTTGAGTGCGGGACGCCTG          | [CAG]-[EcoRI]-[AAC]-[start<br><i>actS</i> ; fwd]                                                 | pGS100- <i>actS</i><br>pGS100- <i>actS</i> <sub>LysM</sub><br>pGS100- <i>actS</i> <sub>LytM</sub> |
| AP619/29 <i>actS</i> -r       | TATCAAGCTTTCAGCATTTTGGCTTGCTG           | [TATC]-[HindIII]-[stop <i>actS</i> ; rev]                                                        | pGS100- <i>actS</i><br>pGS100- <i>actS</i> <sub>LysM</sub><br>pGS100- <i>actS</i> <sub>LytM</sub> |
| AP621/ 33 <i>actS</i> -r      | CCGCTCGAGTCAGCATTTTGGCTTGCTGCCCTG       | [CCG]-[XhoI]-[stop <i>actS</i> ; rev]                                                            | pET28a-His-ActS                                                                                   |
| AP677 28 <i>actS</i> 26-f     | AGCCATATGTCGGGTAGCAAATCATCCG            | [AGC]-[NdeI]-[starting at 78 bp<br>downstream of TTG of <i>actS</i> ; fwd]                       | pET28a-His-ActS                                                                                   |
| AP703/33 <i>actS</i> int-r    | TATCAAGCTTTCATGCGGTTTTGGTCGTTGATT       | [TATC]-[HindIII]-[TC]-[316 bp<br>downstream of TTG of <i>actS</i> ; rev]                         | pGS100- <i>actS</i> <sub>LysM</sub>                                                               |
| AP704/40 <i>actS</i> ssLytM-r | CTGCTACTTTTCGCCCCACCGCCGGAATACGTTCTGTAT | [117 bp downstream of TTG of<br><i>actS</i> ]-[252 bp downstream of<br>TTG of <i>actS</i> ; rev] | pGS100- <i>actS</i> <sub>LytM</sub>                                                               |
| AP705/ 20 <i>actS</i> LytM-f  | GGTGGGGCGAAAAGTAGCAG                    | [252 bp downstream of TTG of<br><i>actS</i> ; rev]                                               | pGS100- <i>actS</i> <sub>LytM</sub>                                                               |
| <i>envC</i> -f                | GGAATTCCATATGGATGAGCGTGACCAACTC         | [GGAATTC]-[NdeI]-[starting at<br>113bp downstream of ATG of<br><i>envC</i> ; fwd]                | pET28a-His-EnvC                                                                                   |
| <i>envC</i> -r                | CCCAAGCTTTTATCTTCCAACCACGGC             | [CCC]-[HindIII]-[stop <i>envC</i> ; rev]                                                         | pET28a-His-EnvC                                                                                   |

## Supplemental References

- Baba, T., Ara, T., Hasegawa, M., Takai, Y., Okumura, Y., Baba, M., *et al.* (2006) Construction of *Escherichia coli* K-12 in-frame, single-gene knockout mutants: the Keio collection. *Mol Syst Biol* **2**: 2006.0008.
- Casadaban, M.J., and Cohen, S.N. (1980) Analysis of gene control signals by DNA fusion and cloning in *Escherichia coli*. *J Mol Biol* **138**: 179–207.
- Datsenko, K.A., and Wanner, B.L. (2000) One-step inactivation of chromosomal genes in *Escherichia coli* K-12 using PCR products. *PNAS* **97**: 6640–6645.
- Hanahan, D. (1983) Studies on transformation of *Escherichia coli* with plasmids. *J Mol Biol* **166**: 557–580.
- Kuru, E., Lambert, C., Rittichier, J., Till, R., Ducret, A., Derouaux, A., *et al.* (2017) Fluorescent D-amino-acids reveal bi-cellular cell wall modifications important for *Bdellovibrio bacteriovorus* predation. *Nat Microbiol* **2**: 1648–1657.
- Morè, N., Martorana, A.M., Biboy, J., Otten, C., Winkle, M., Serrano, C.K.G., *et al.* (2019) Peptidoglycan remodeling enables *Escherichia coli* to survive severe outer membrane assembly defect. *mBio* **10**: e02729-18.
- Sperandeo, P., Pozzi, C., Dehò, G., and Polissi, A. (2006) Non-essential KDO biosynthesis and new essential cell envelope biogenesis genes in the *Escherichia coli* *yrbG-yhbG* locus. *Res Microbiol* **157**: 547–558.
- Uehara, T., Parzych, K.R., Dinh, T., and Bernhardt, T.G. (2010) Daughter cell separation is controlled by cytokinetic ring-activated cell wall hydrolysis. *EMBO J* **29**: 1412–1422.
